# Supplementary material
Source: MDPI journal article supplement (https://www.mdpi.com/2813-3145/2/4/32)
Supplement: s1 [file s1]

## Element Composition of Fractionated Water-Extractable Soil Colloidal Particles Separated by Track-Etched Membranes

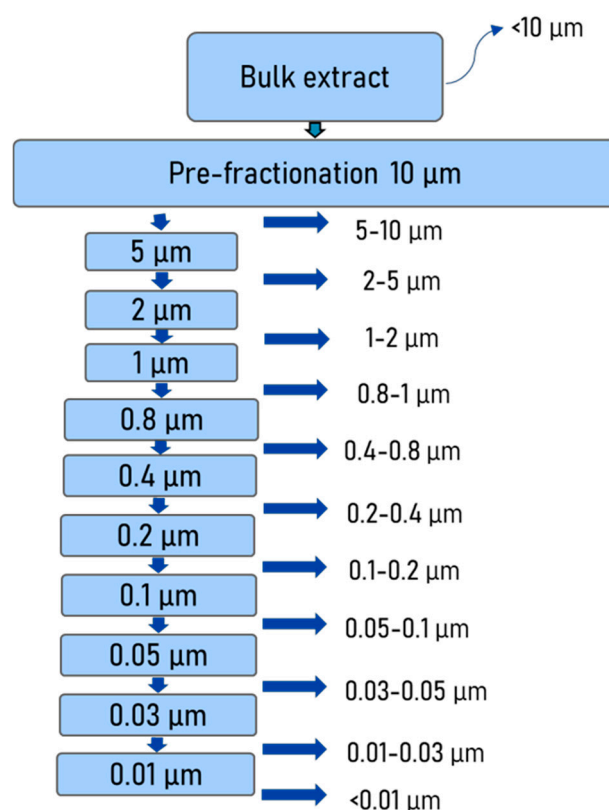

**Figure S1.** General scheme for sequential fractionation of water-soluble soil organic matter using a polycarbonate track-etched membrane.

**Table S1.** Wavelengths (nm) for ICP–AES measurements

| Elements | Emission lines, nm                                     |
|----------|--------------------------------------------------------|
| Ag       | 328.07, 338.29                                         |
| Al       | 308.22, 394.40, 396.15                                 |
| As       | 188.98, 193.70, 197.20, 234.98                         |
| B        | 182.58, 208.89, 208.96, 249.68                         |
| Ba       | 230.42, 233.53, 455.40, 493.41, 614.17                 |
| Be       | 234.86, 249.47, 313.04, 313.11                         |
| Ca       | 315.89, 317.93, 393.37, 396.85, 422.67                 |
| Cd       | 228.80                                                 |
| Co       | 230.79, 231.160, 237.863, 238.892, 258.03              |
| Cr       | 267.716, 276.259, 276.653, 313.205                     |
| Cu       | 324.754, 327.400                                       |
| Fe       | 238.204, 239.563, 258.590, 259.940, 263.105            |
| K        | 404.72, 766.49, 769.90                                 |
| Li       | 610.37, 670.78                                         |
| Mg       | 277.98, 279.55, 279.80, 280.27, 285.21, 383.23, 383.83 |
| Mn       | 257.61, 259.37, 260.57, 293.305, 293.931, 294.92       |

---

|    |                                                  |
|----|--------------------------------------------------|
| Mo | 202.03, 281.62, 284.82, 289.10, 313.26, 379.83   |
| Na | 568.82, 589.00, 589.59                           |
| Ni | 216.56, 221.65, 227.02, 230.299, 231.604, 231.10 |
| P  | 185.88, 213.62, 214.91                           |
| Pb | 220.35                                           |
| S  | 180.67, 181.97, 182.56                           |
| Sb | 206.83, 217.58, 231.15                           |
| Sc | 357.63, 424.68, 361.38, 357.25, 335.37           |
| Se | 196.03                                           |
| Si | 250.69, 251.43, 251.61, 252.41, 252.85, 288.16   |
| Sn | 189.925, 283.998, 317.503, 326.233               |
| Sr | 346.445, 407.771, 416.179, 421.552               |
| Ti | 334.188, 334.941, 336.122, 337.280, 368.520      |
| V  | 289.265, 292.401, 311.837                        |
| W  | 207.91, 216.63, 222.59, 222.96, 224.88           |
| Zn | 202.55, 206.200, 213.86, 334.56                  |

### Calculations

Based on the described sample preparation procedure, the concentrations of the detected elements were recalculated per sample of soil as follows

Recalculation for the bulk reaction

$$c(M)_{\text{soil}} = \frac{m(M)}{m_{\text{sample}}(40 \text{ g})'} \quad (\text{S1})$$

$$m(M) = c(M)_{\text{ICP}} \frac{V_{\text{ICP}}(10 \text{ mL})}{V_{\text{ICP, aliquot}}(0.2 \text{ mL})} \frac{V_{\text{sample}}(25 \text{ mL})}{V_1(24.5 \text{ mL})} \frac{V_{\text{fraction}}(365 \text{ mL})}{1000}. \quad (\text{S2})$$

Recalculation for the final fraction

$$c(M)_{\text{soil}} = \frac{m(M)}{m_{\text{sample}}(40 \text{ g})'} \quad (\text{S3})$$

$$m(M) = c(M)_{\text{ICP}} \frac{V_{\text{ICP}}(10 \text{ mL})}{V_{\text{ICP, aliquot}}(5 \text{ mL})} \frac{V_{\text{sample}}(25 \text{ mL})}{V_1(24.5 \text{ mL})} \frac{V_{\text{fraction}}(250 \text{ mL})}{1000}. \quad (\text{S4})$$

Recalculation for intermediate fractions

$$c(M)_{\text{soil}} = \frac{m(M)}{m_{\text{sample}}(40 \text{ g})'} \quad (\text{S5})$$

$$m(M) = c(M)_{\text{ICP}} \frac{V_{\text{ICP}}(10 \text{ mL})}{V_{\text{ICP, aliquot}}(0.2/5 \text{ mL})} \frac{V_{\text{sample}}(25 \text{ mL})}{1000}. \quad (\text{S6})$$

Calculation of uncertainties for obtained values of concentration  $c_i$

$$\delta(c_i) = \pm t_{\alpha, f} \frac{s_x}{\sqrt{n}} \quad (\text{S7})$$

where  $t_{\alpha, f}$  is Student's coefficient for  $\alpha = 0.05$ ,  $f = n - 1$  is the degree of freedom,  $n$  is number of measurements, and  $s_x$  is the standard deviation.
